# Supplementary material for: Stabilization of the aqueous phase fraction of pine wood bio-oil using zirconia-supported Fe/Cu/Pd nano-catalysts under mild conditions
Source: Royal Society of Chemistry journal article supplement (doi:10.1039/d3nj00348e), 2023-01-01
Supplement: d3nj00348e1.pdf [file d3nj00348e1.pdf]

## Stabilization of the aqueous phase fraction of pine wood bio-oil using zirconia-supported Fe/Cu/Pd nano-catalysts at mild conditions

Giuseppe Bagnato<sup>1,2,3\*</sup>, Michela Signoretto<sup>4</sup>, Elena Ghedini<sup>4</sup>, Federica Menegazzo<sup>4</sup>, Xiaoying Xi<sup>3</sup>, Gert H. ten Brink<sup>3</sup>, Bart J. Kooi<sup>3</sup>, Hero Jan Heeres<sup>3</sup>, Aimaro Sanna<sup>1\*</sup>

<sup>1</sup>Advanced Biofuels Lab, Institute of Mechanical, Process and Energy Engineering, School of Engineering & Physical Sciences, Heriot-Watt University, Edinburgh, EH14 4AS, UK.

<sup>2</sup>Department of Chemical Engineering, Engineering and Technology Institute Groningen, University of Groningen, 9747 AG Groningen, NL.

<sup>3</sup>Department of Engineering, Lancaster University, Lancaster, LA1 4YW.

<sup>4</sup>CATMAT Lab, Department of Molecular Sciences and Nanosystems, Ca' Foscari University Venice and INSTM-RU Ve, Via Torino 155, 30172 Venezia Mestre, IT.

\* Corresponding authors

Giuseppe Bagnato, e-mail: [G.Bagnato@lancaster.ac.uk](mailto:G.Bagnato@lancaster.ac.uk)

Aimaro Sanna, e-mail: [A.Sanna@hw.ac.uk](mailto:A.Sanna@hw.ac.uk) Tel.: +44(0)1314518108

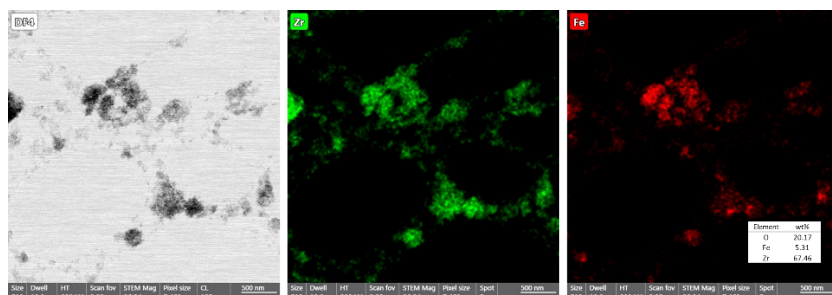

Figure S1. TEM image and elemental mapping for FeZrO<sub>2</sub>.

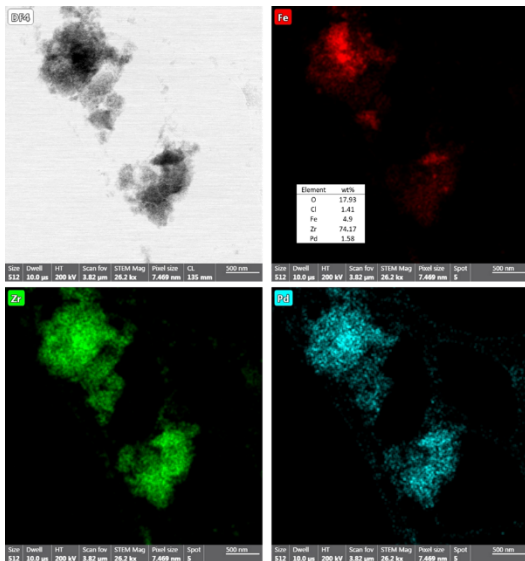

Figure S2. TEM image and elemental mapping for FePdZrO<sub>2</sub>.

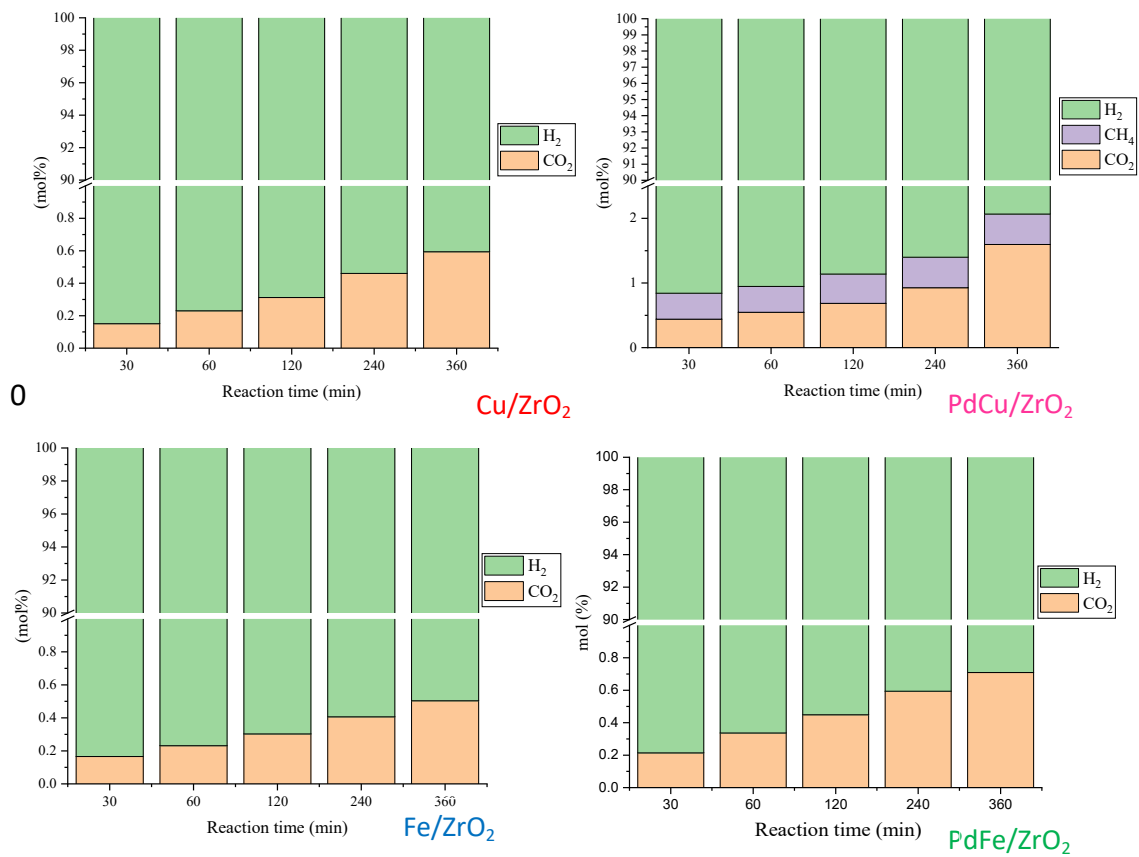

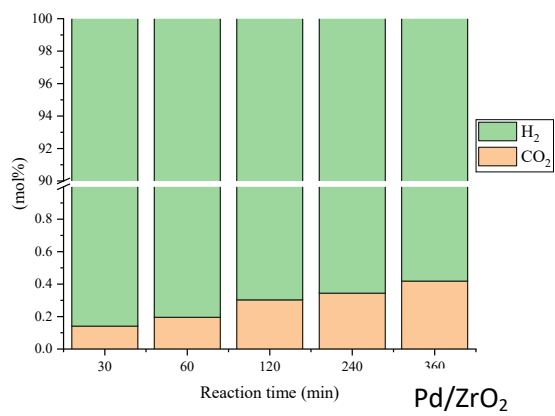

Figure S3. Gas products composition at different reaction time of LTMP hydrogenation at 100 °C and 50 bar.

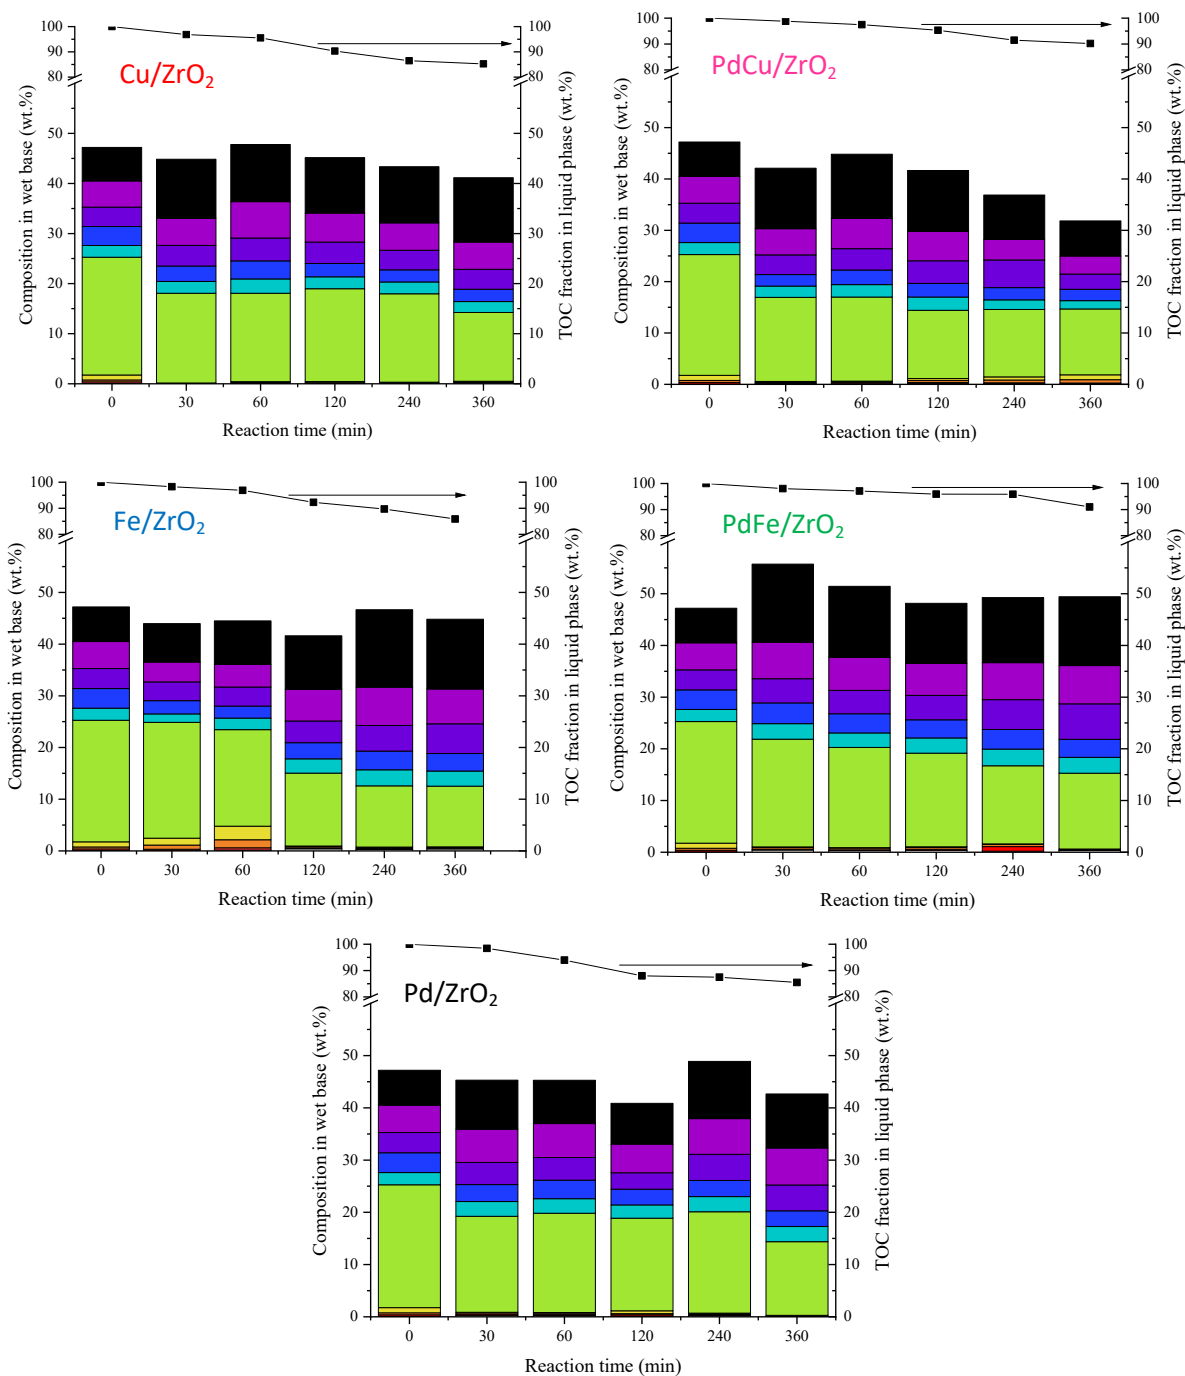

**FigureS4.** Products distribution at different reaction time of LTMP hydrogenation at 100 °C and 50 bar for a) PdCu/ZrO<sub>2</sub> and b) PdFe/ZrO<sub>2</sub> catalysts. ■ catechols, ■ phenolics, ■ ketones/alcohols, ■ levoglucosan, ■ guaiacols, ■ acids, ■ alkanes, ■ aromatics, ■ cyclohexenes, ■ naphthalenes

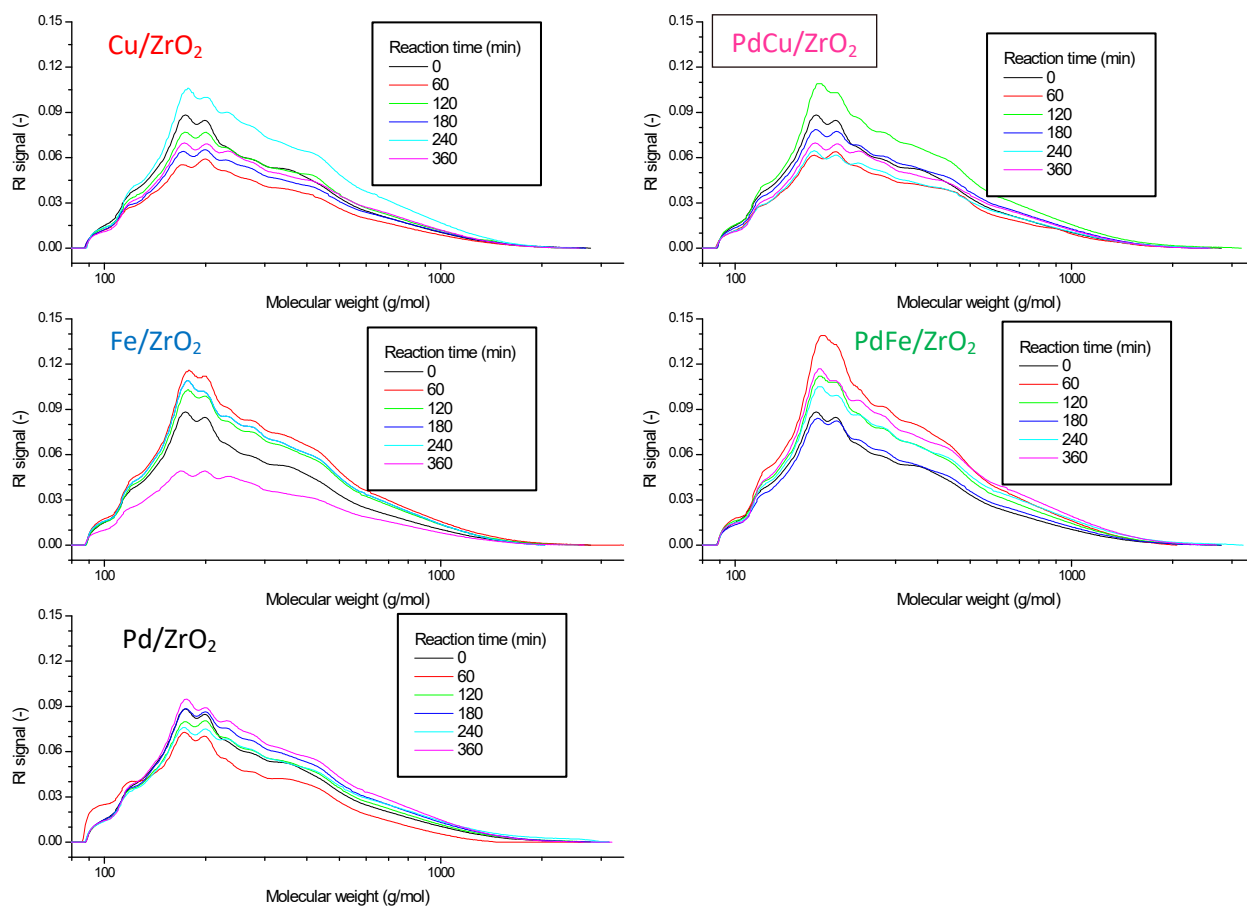

Figure S5. Molecular weight distribution (in dry base) for at different reaction time of LTMP hydrogenation at 100 °C and 50 bar

Table S1. GC-MS compounds

| N  | Compound                                      | N  | Compound                                      | N   | Compound                                         |
|----|-----------------------------------------------|----|-----------------------------------------------|-----|--------------------------------------------------|
| 1  | (3-Methyl-oxiran-2-yl)-methanol               | 36 | 2- Hydroxy octanoic acid                      | 71  | Acetic acid                                      |
| 2  | (S)-(+)-1,2-Propanediol                       | 37 | 2-Hydroxy-3,5-dimethylcyclopent-2-en-1-one    | 72  | Acetic acid, decyl ester                         |
| 3  | (S)-(+)-2',3'-Dideoxyribonolactone            | 38 | 2-Isobutoxyethyl acetate                      | 73  | Ethanol, 2-(pentyloxy)-, acetate                 |
| 4  | 1-(2-Ethoxyphenyl)acetone                     | 39 | 2-Pentanone, 5-(acetyloxy)-                   | 74  | Ethanol, 2-(vinyloxy)-                           |
| 5  | 1,2-Benzenediol                               | 40 | 2-Pentenoic acid                              | 75  | Ethanone, 1-(2-furanyl)-                         |
| 6  | 1,2-Cyclopentanediol, trans-                  | 41 | 2-Propanone, 1,3-dihydroxy-                   | 76  | Ethanone, 1-(4-hydroxy- 3-methoxyphenyl)-        |
| 7  | 1,2-Dimethoxy-4-n-propylbenzene               | 42 | 2-Propanone, 1-hydroxy-                       | 77  | Ethanone, 1-oxiranyl-                            |
| 8  | 1,2-Epoxy- 3-propylacetate                    | 43 | 2-Propenoic acid, 2-methyl-, ethyl ester      | 78  | Ethene, ethoxy-                                  |
| 9  | 1,2-Ethanediol                                | 44 | 3,3-Dimethyl- 2, 4-pentanedione               | 79  | Ethyl alcohol                                    |
| 10 | 1,2-Ethanediol, monoacetate                   | 45 | 3,3-Dimethyl- 2-pentanone                     | 80  | Ethyl ether                                      |
| 11 | 1,2-Propanediol, 3-methoxy-                   | 46 | 3,4-Altrosan                                  | 81  | Ethyl hydrogenoxalate                            |
| 12 | 1,3,6-Trioxocane                              | 47 | 3,4-Anhydro- d-galactosan                     | 82  | Eugenol                                          |
| 13 | 1,3-Butanediol, diacetate                     | 48 | 3,4-Dihydroxy- 5-methyl-dihydrofuran- 2-one   | 83  | Formaldehyde                                     |
| 14 | 1,3-Dioxane, 4-methyl-                        | 49 | 3,5-dimethyl-2(5H)-furanone                   | 84  | Formic acid                                      |
| 15 | 1,3-Dioxane-4,6-dione, 2,2-dimethyl-          | 50 | 3,6-Dimethylperhydro-1,3-oxazine              | 85  | Formic acid, 1-methyl ethyl ester                |
| 16 | 1,3-Dioxepane, 2-methyl-2-propyl-             | 51 | 3,7-Benzofurandiyl, 2,3-dihydro-2,2-dimethyl- | 86  | Formic acid, ethenyl ester                       |
| 17 | 1,3-Dioxolane, 2,4,5-trimethyl-               | 52 | 3-Butene-1, 2-diol                            | 87  | Furan                                            |
| 18 | 1,3-Dioxolane, 2-methyl-                      | 53 | 3-Butenoic acid                               | 88  | Furan, tetrahydro-                               |
| 19 | 1,4- Butanediol                               | 54 | 3-Cyclobutene-1 ,2-dione, 3,4-dihydroxy-      | 89  | Furfural                                         |
| 20 | 1,4- Diacetoxy butane                         | 55 | 3-Cyclohexen-1-carboxaldehyde, 3-methyl-      | 90  | Furyl hydroxyl methyl ketone                     |
| 21 | 1,4:3,6-Dianhydro-a-d-glucopyranose           | 56 | 3-Heptanol, 2-methyl-                         | 91  | Galacto-heptulose                                |
| 22 | 1,4-Benzenediol, 2-methyl-                    | 57 | 3-Hexanone                                    | 92  | Galactosan triacetate                            |
| 23 | 1,4-Butanediol, diacetate                     | 58 | 3-Mercaptohexyl hexanoate                     | 93  | Glycidol                                         |
| 24 | 1,4-Dioxane, 2-ethyl-5-methyl-                | 59 | 3-Pentanol                                    | 94  | Guanidineacetic acid                             |
| 25 | 1,4-Pentadiene                                | 60 | 4-Methyl- 2-tert-octylphenol                  | 95  | Hexane, 2,3,5- trimethyl-                        |
| 26 | 1,4-Pentanediol                               | 61 | 4-Methyl- 5H-furan- 2-one                     | 96  | Hexanoic acid                                    |
| 27 | 1,6-Anhydro- b-D-glucopyranose (levoglucosan) | 62 | 5- Hydroxy methyl dihydrofuran- 2-one         | 97  | Hexanoic acid, 3-hydroxy -5-methyl-, methylester |
| 28 | 1-Hepten- 4-ol                                | 63 | 5,9-Dodecadien-2-one, 6,10-dimethyl           | 98  | Hexanoic acid, 5-oxo-, ethyl ester               |
| 29 | 1-Heptene                                     | 64 | 5-Hydroxymethyl-dihydrofuran-2-one            | 99  | Homovanillyl alcohol                             |
| 30 | 1-Hydroxy- 2-butanone                         | 65 | 5-Methylfurfural                              | 100 | Hydroquinone                                     |
| 31 | 1-Hydroxy- 2-pentanone                        | 66 | 6,6,7-Trimethyl- octane- 2,5-dione            | 101 | Hydroxymethylfurfural                            |
| 32 | 1-Pentanol, 2,3-dimethyl-                     | 67 | 6-Dodecanone                                  | 102 | Isocrotonic acid                                 |
| 33 | 1-Propanol                                    | 68 | 7-Decen-2-one                                 | 103 | L-Mannose, 6-deoxy-                              |
| 34 | 1-Propanol, 2-methyl-                         | 69 | Acetaldehyde                                  | 104 | Maltol                                           |
| 35 | 1-Propene, 3-methoxy- 2-methyl-               | 70 | Acetaldehyde, hydroxy-                        | 105 | Methyl a d-rhamnopyranoside                      |

## Continued

| N   | Compound                                           | N   | Compound                                               | N   | Compound                                       |
|-----|----------------------------------------------------|-----|--------------------------------------------------------|-----|------------------------------------------------|
| 106 | Methyl formate                                     | 142 | 2H-Pyran, tetrahydro- 2-methyl-                        | 177 | Ethanol, 2-(2,3-butadienyloxy)-                |
| 107 | Methyl propionate                                  | 143 | 2H-Pyran-2-one                                         | 179 | n-Butyl ether                                  |
| 108 | Montanol                                           | 144 | Acetic acid, methyl ester                              | 180 | n-Capric acid isopropyl                        |
| 109 | 2(3H)-Furanone, 5-ethylidihydro-                   | 145 | Acetone                                                | 181 | n-Propyl acetate                               |
| 110 | 2(3H)-Furanone, dihydro- 4-hydroxy-                | 146 | Benzaldehyde, 2-hydroxy- 3-methoxy- (Vanillin)         | 182 | Octane, 2,6,6 -trimethyl-                      |
| 111 | 2(5H)-Furanone                                     | 147 | Benzaldehyde, 4-hydroxy-                               | 183 | Octanoic Acid                                  |
| 112 | 2(5H)-Furanone, 5-methyl-                          | 148 | Benzene acetaldehyde, 2-methoxy-                       | 184 | Oxalic acid, ethyl propyl ester                |
| 113 | 2,2-Dimethyl pentyl cyclohexane carboxylate        | 149 | Benzene acetic acid, 4-hydroxy- 3-methoxy-             | 185 | Oxirane, (ethoxymethyl)-                       |
| 114 | 2,3-Anhydro-d-galactosan                           | 150 | Benzeneacetic acid, 4-hydroxy-3-methoxy-, methyl ester | 186 | Oxirane, 2,3- dimethyl-                        |
| 115 | 2,3-Anhydro-d-mannosan                             | 151 | Butanal                                                | 187 | Oxirane, 3-hydroxypropyl-                      |
| 116 | 2,3-Dihydrofuran                                   | 152 | Butanal, 2-methyl-                                     | 188 | Pentanal                                       |
| 117 | 2,3-O-Acetonemannosan                              | 153 | Butanal, 3-hydroxy-                                    | 189 | Pentanoic acid                                 |
| 118 | 2,4-Diacetoxypentane                               | 154 | Butanal,2-ethyl-                                       | 190 | Pentanoic acid, 2-methyl-4-oxo-, ethyl ester   |
| 119 | 2,5-Furandione, 3-methyl-                          | 155 | Butane, 1-methoxy-                                     | 191 | Pentanoic acid,4-oxo-, butyl ester             |
| 120 | 2,5-Furandione, dihydro-3-methylene-               | 156 | Butanedial                                             | 192 | Phenol, 2,4-dimethyl-                          |
| 121 | 2,5-Hexanedione                                    | 157 | Butanedioic                                            | 193 | Phenol, 2-methoxy- 4-methyl-                   |
| 122 | 2-Acetylamino-3-hydroxy-propionic acid             | 158 | Butanoic acid                                          | 194 | Phenol, 2-methoxy- 6-(1-propenyl)-             |
| 123 | 2-Butanone, 4-hydroxy-                             | 159 | Butanoic acid, methylester                             | 195 | Phenol, 2-methoxy-1                            |
| 124 | 2-Butenal, 2-methyl-                               | 160 | Butylated Hydroxy toluene                              | 196 | Phenol, 2-methoxy-4-methyl-                    |
| 125 | 2-Butene-1, 4-diol                                 | 161 | Butyrolactone                                          | 197 | Phenol, 2-methoxy-4-propyl-                    |
| 126 | 2-Butenoic acid, 2-methoxy-3-methyl-, methyl ester | 162 | Carbonicacid, isobutyl isohexyl ester                  | 198 | Phenol, 2-methyl-                              |
| 127 | 2-Cyclopenten- 1-one                               | 163 | Crotonic acid                                          | 199 | Phenol, 3-ethyl-                               |
| 128 | 2-Cyclopenten- 1-one, 2-methyl-                    | 164 | Cyclobutane, methyl-                                   | 200 | Phenol, 5-methoxy-2,3-dimethyl-                |
| 129 | 2-Cyclopenten- 1-one, 3-ethyl- 2-hydroxy-          | 165 | Cyclobutanol                                           | 201 | Propanal                                       |
| 130 | 2-Cyclopenten-1-one, 2-hydroxy-                    | 166 | Cyclobutanone, 2-methyl- 4-hydroxy-                    | 202 | Propanal, 2,3-dihydroxy-                       |
| 131 | 2-Cyclopenten-1-one, 2-hydroxy-3,4 -dimethyl-      | 167 | Cyclohexan- 1,4,5-triol -3-one -1-carboxylic acid      | 203 | Propane, 1-methoxy-2-methyl-                   |
| 132 | 2-Cyclopenten-1-one, 2-hydroxy-3-methyl-           | 168 | Cyclohexane, ethyl-                                    | 204 | Propane, 2-(ethenyloxy)-                       |
| 133 | 2-Cyclopenten-1-one, 3-(acetyloxy)                 | 169 | Cyclohexanol,2-methyl-                                 | 205 | Propanoic acid                                 |
| 134 | 2-Deoxy-D-glucose                                  | 170 | Cyclohexanone, 4-hydroxy-                              | 206 | Propanoic acid, 2-methyl-, 1-methylethyl ester |
| 135 | 2-Ethoxyethyl acetate                              | 171 | Cyclopentane, 1,1-dimethyl-                            | 207 | Propanoic acid, 3-hydroxy-, methyl ester       |
| 136 | 2-Furancarboxaldehyde, 5-(hydroxymethyl)-          | 172 | Cyclopropyl carbinol                                   | 208 | Styracitol                                     |
| 137 | 2-Furancarboxaldehyde, 5-methyl-                   | 173 | D-Erythro -Pentose, 2-deoxy-                           | 209 | Succinic anhydride                             |
| 138 | 2-Furancarboxylic acid                             | 174 | D-Glucose, 6-O-a -D-galactopyranosyl-                  | 210 | trans-5 -Methyl- 2-isopropyl- 2-hexen          |
| 139 | 2-Furanmethanol, tetrahydro-                       | 178 | Ethanol, 2-(2-butoxyethoxy)-, acetate                  | 211 | Vanillin                                       |
| 140 | 2-Hexanone, 4-methyl-                              | 175 | d-Glycero -d-galacto -heptose                          |     |                                                |
| 141 | 2-Hexene, 2,5-dimethyl-                            | 176 | dl-Glyceraldehyde                                      |     |                                                |

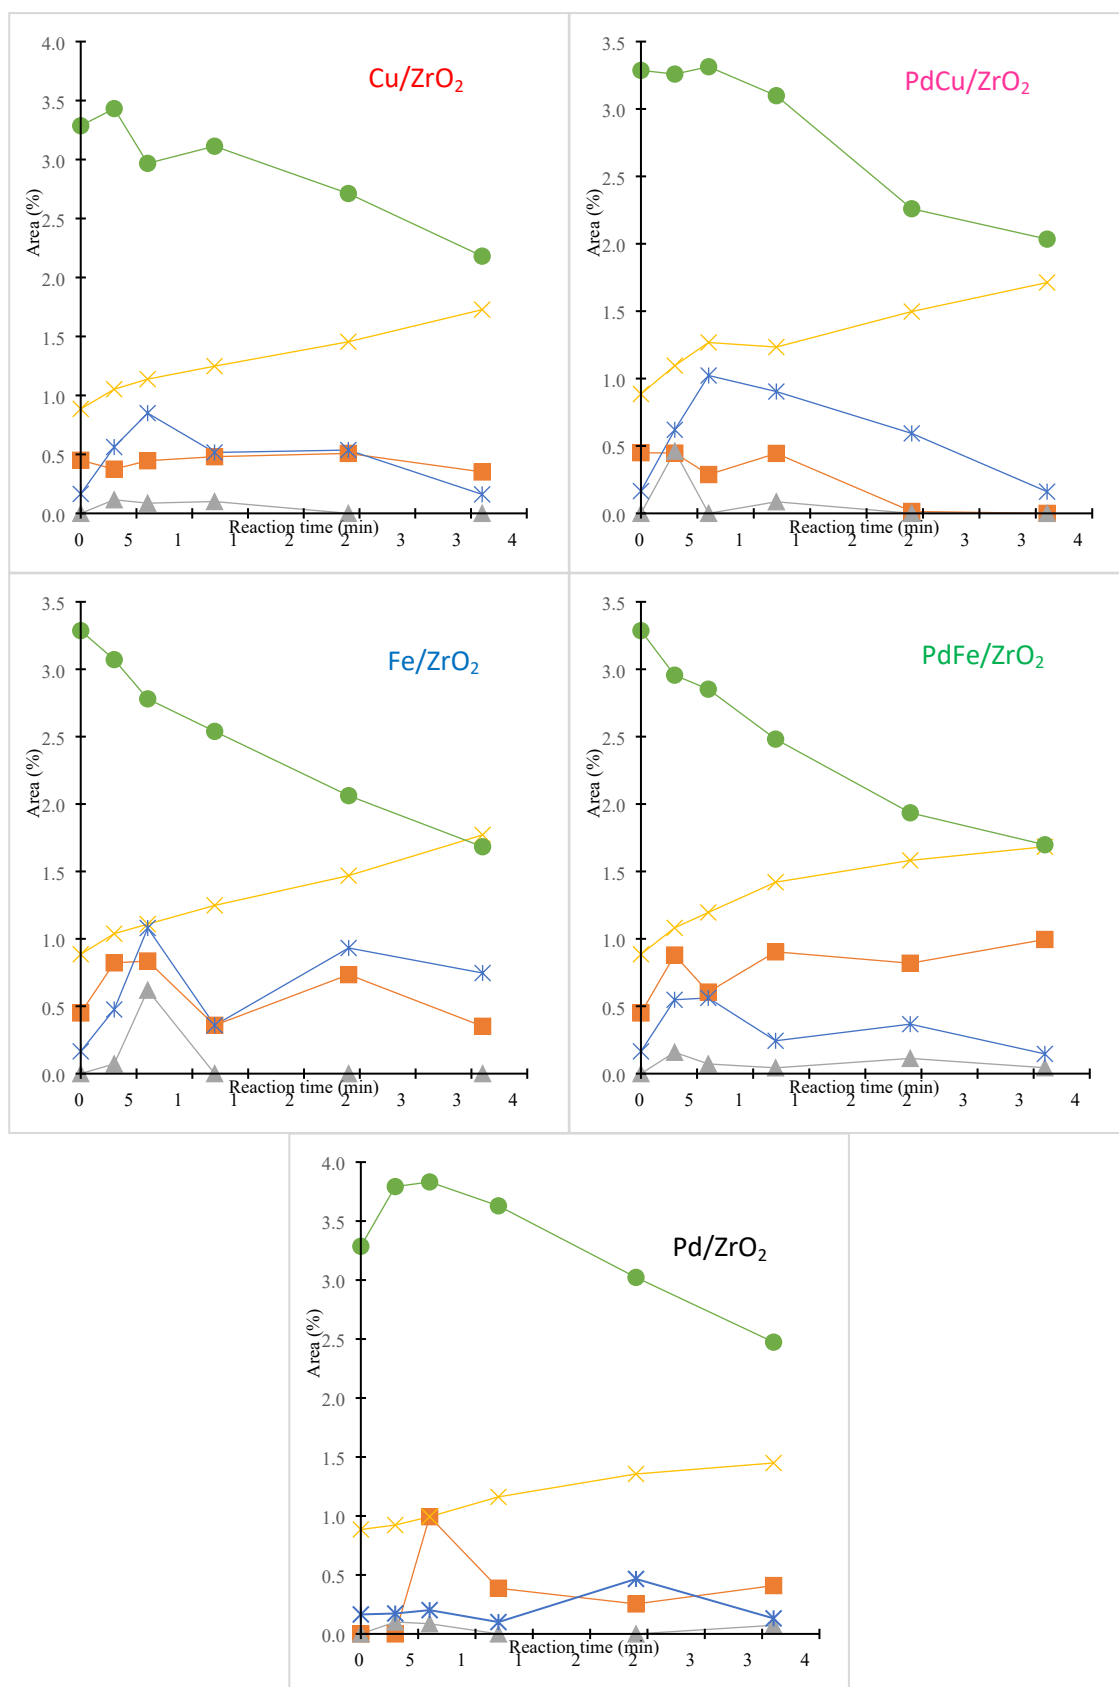

Figure S6. GC-MS qualitative analysis for cellulose fraction. — Glycero-d-galacto-heptose, — Butanediol, — Ethanediol, — Ethanol, — Acetaldehyde, hydroxy-.



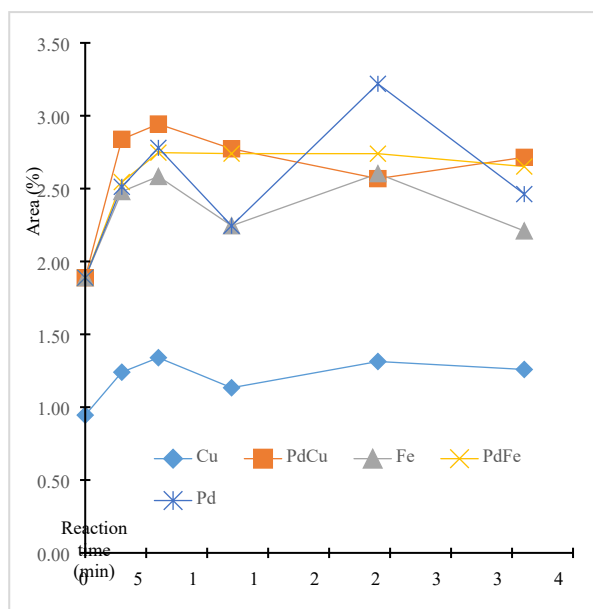

Figure S7. GC-MS qualitative analysis for Vanillin

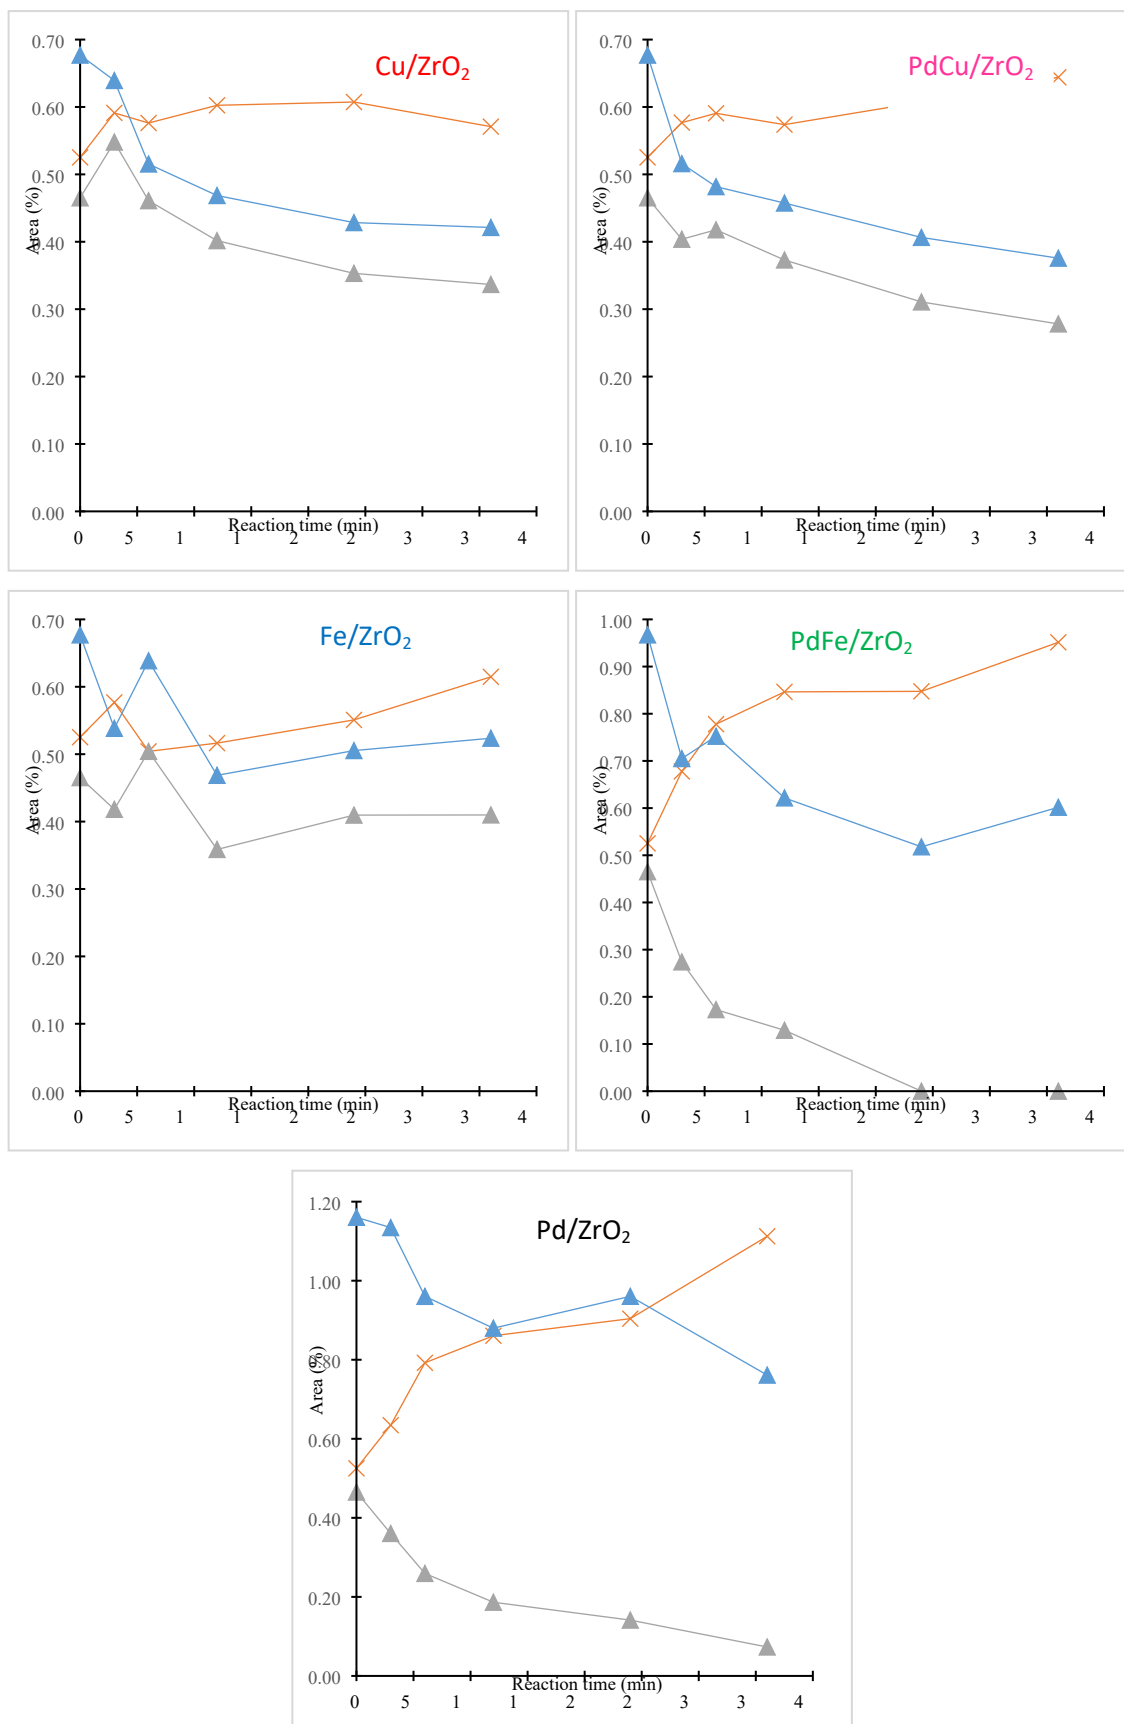

Figure S8. GC-MS qualitative analysis for hemicellulose fraction. —x—  $\gamma$  Butyrolactone, —▲— 2-Cyclopenten-1-one, —▲— Furfural.

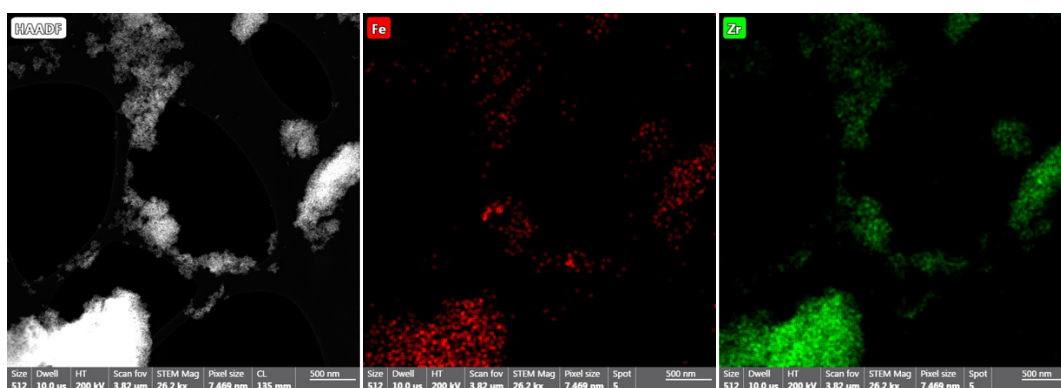

Figure S9. TEM-EDS of FeZrO<sub>2</sub>

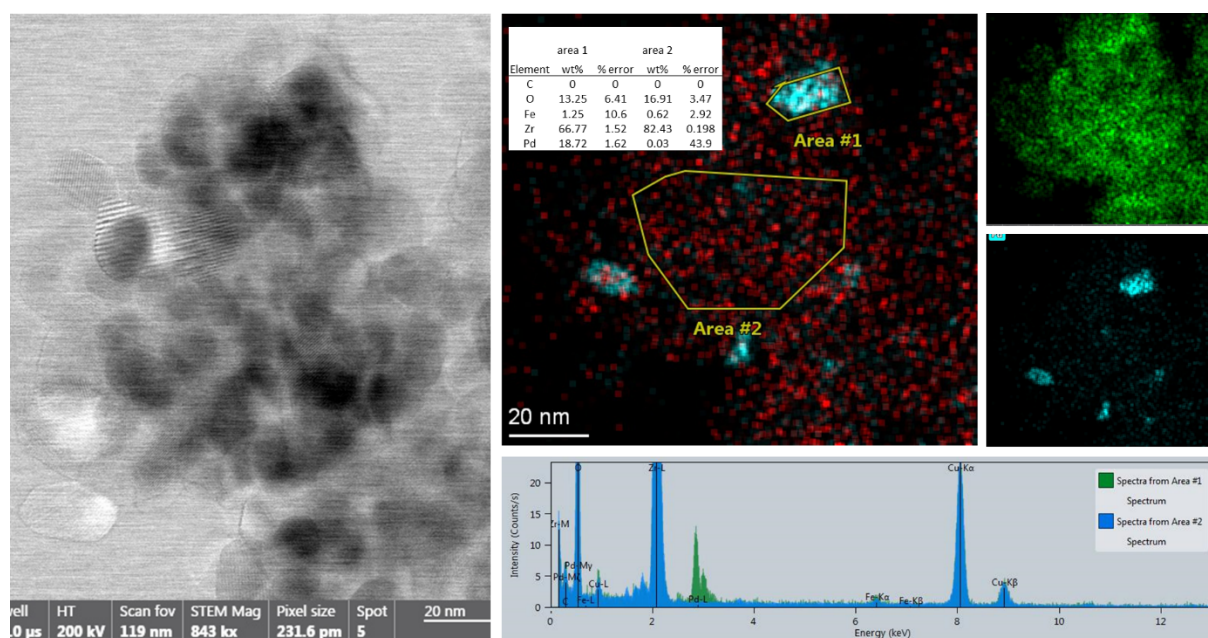

Figure S10. STEM-EDS of FePdZrO<sub>2</sub>

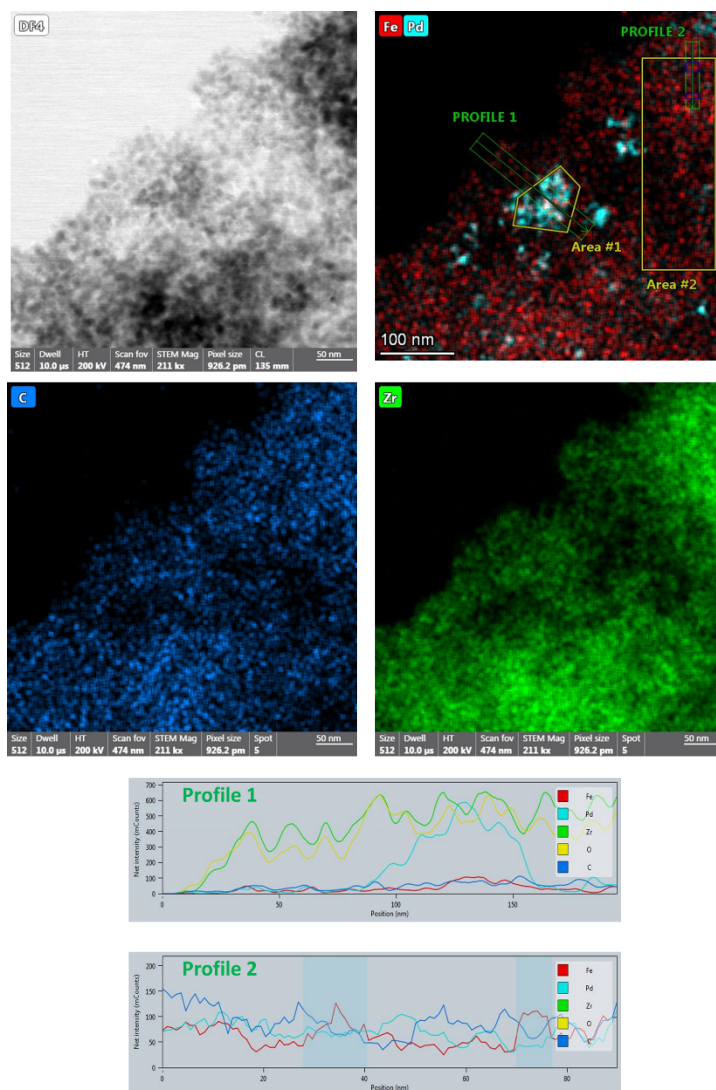

Figure S11. STEM-EDS of profiles for FePdZrO<sub>2</sub>.

Table S2. Elemental analysis of areas 1 and 2 for FePdZrO<sub>2</sub> from Figure S8.

| Element | area 1 |         | area 2 |         |
|---------|--------|---------|--------|---------|
|         | wt%    | % error | wt%    | % error |
| O       | 11.21  | 1.90    | 11.92  | 2.55    |
| Fe      | 1.04   | 2.75    | 0.54   | 2.79    |
| Zr      | 77.43  | 0.35    | 87.33  | 0.07    |
| Pd      | 10.31  | 0.63    | 0.21   | 3.32    |
